# Supplementary material for: Nanocomposite Polymer Gel Electrolyte Based on TiO2 Nanoparticles for Lithium Batteries
Source: MDPI journal article supplement (doi:10.3390/membranes13090776), 2023-09-01
Supplement: s1 [file s1]

## Nanocomposite polymer gel electrolyte based on TiO<sub>2</sub> nanoparticles for lithium batteries

Nikita A. Slesarenko, Alexander V. Chernyak, Kyunsylu G. Khatmullina, Guzaliya R. Baymuratova, Alena V. Yudina, Galiya Z. Tulibaeva, Alexander F. Shestakov, Vitaly I. Volkov, and Olga V. Yarmolenko

### Table of Contents

|                                                                                                                                                                                                                                                                                               |    |
|-----------------------------------------------------------------------------------------------------------------------------------------------------------------------------------------------------------------------------------------------------------------------------------------------|----|
| <b>Figure S1.</b> (a) SEM image of the TiO <sub>2</sub> nanopowder; (b) photographs of the NPE6* film; (c) optical images of the NPE0 film surface and (d) NPE6 film surface .....                                                                                                            | 2  |
| <b>Table S1.</b> Compositions of the nanocomposite polymer gel electrolytes .....                                                                                                                                                                                                             | 3  |
| <b>Figure S2.</b> Dependence of the NPE conductivity on the content of TiO <sub>2</sub> nanoparticles .....                                                                                                                                                                                   | 3  |
| <b>Table S2.</b> Glass transition temperature of NPE (according to the DSC data) .....                                                                                                                                                                                                        | 4  |
| <b>Figure S3.</b> Nyquist plots of the SS/NPE/SS cell at room temperature for (a) NPE0, (b) NPE2, (c) NPE6 and the equivalent circuit models, where R is the electrolyte resistance, CPE is the constant phase element, (d) the high frequency region of the Nyquist plots for all NPEs ..... | 5  |
| <b>Table S3.</b> Calculation of elements of equivalent circuit model .....                                                                                                                                                                                                                    | 6  |
| <b>Table S4.</b> Conductivity of the nanocomposite polymer gel electrolytes based on the ionic liquid EMIBF <sub>4</sub> .....                                                                                                                                                                | 6  |
| <b>Figure S4.</b> Arrhenius temperature dependences of the NPE conductivities .....                                                                                                                                                                                                           | 6  |
| <b>Figure S5.</b> Calculation of the effective conduction activation energy for NPE0 (a, b), NPE2 (c, d) and NPE6 (e, f) in two temperature ranges: from –40 to 25 °C (a, c, e) and from 40 to 100 °C (b, d, f) .....                                                                         | 7  |
| <b>Figure S6.</b> <sup>7</sup> Li NMR spectra of the electrolytes (a) NPE2 and (b) NPE6 .....                                                                                                                                                                                                 | 8  |
| <b>Figure S7.</b> <sup>11</sup> B NMR spectra of the electrolytes (a) NPE2, (b) NPE6 and (c) ionic liquid EMIBF <sub>4</sub> .....                                                                                                                                                            | 8  |
| <b>Figure S8.</b> <sup>19</sup> F NMR spectra of the electrolytes (a) NPE2, (b) NPE6 and (c) ionic liquid EMIBF <sub>4</sub> .....                                                                                                                                                            | 9  |
| <b>Figure S9.</b> Diffusion decays of NPE2 and NPE6 on <sup>1</sup> H nuclei for (a) EC and (b) EMIBF <sub>4</sub> ...                                                                                                                                                                        | 10 |
| <b>Figure S10.</b> Diffusion decays of NPE2 and NPE6 on (a) <sup>7</sup> Li and (b) <sup>19</sup> F .....                                                                                                                                                                                     | 11 |
| <b>Figure S11.</b> FTIR spectra of the TiO <sub>2</sub> and SiO <sub>2</sub> nanoparticles .....                                                                                                                                                                                              | 12 |
| <b>Figure S12.</b> Current rate capability of the Li // LiFePO <sub>4</sub> cells in the C/10 to C/2 range: (a) NPE0*; (b) NPE2*; (c) NPE6* .....                                                                                                                                             | 13 |

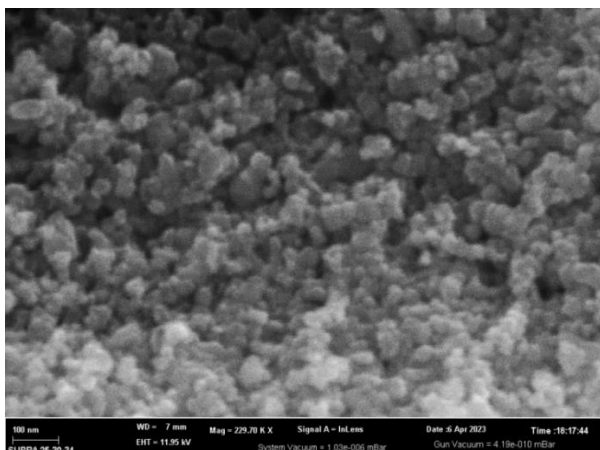

(a)

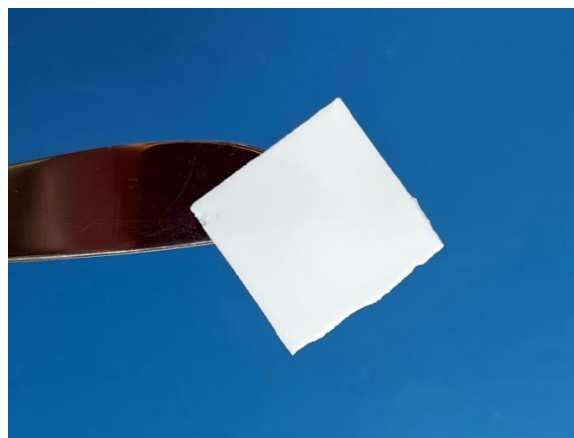

(b)

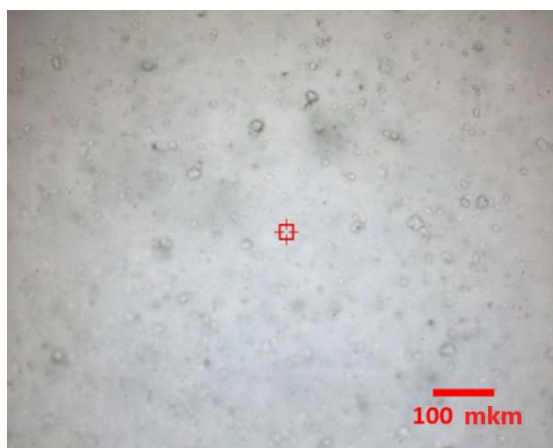

(c)

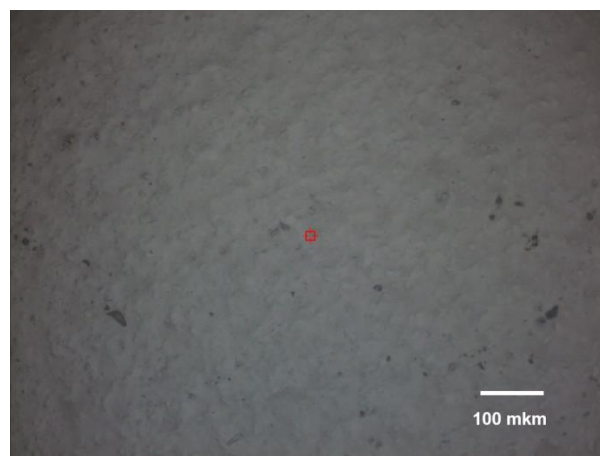

(d)

**Figure S1.** (a) SEM image of the  $\text{TiO}_2$  nanopowder; (b) photographs of the NPE6\* film; (c) optical images of the NPE0 film surface and (d) NPE6 film surface

SEM image of the  $\text{TiO}_2$  nanopowder was obtained using a ZEISS LEO SUPRA 25 scanning autoemission electron microscope.

The optical images of the NPE film surfaces were obtained using a DRX-2 microscope (Thermo Fisher, USA) with 10× objective with an NA of 0.50.

**Table S1.** Compositions of the nanocomposite polymer gel electrolytes

| No. | PEGDA,<br>wt. % | LiBF <sub>4</sub> :EC (1:3 mol),<br>wt. % | TiO <sub>2</sub> ,<br>wt. % | PB,<br>wt. % |
|-----|-----------------|-------------------------------------------|-----------------------------|--------------|
| 1   | 30              | 69                                        | 0                           | 1            |
| 2   | 30              | 67                                        | 2                           | 1            |
| 3   | 30              | 65                                        | 4                           | 1            |
| 4   | 30              | 63                                        | 6                           | 1            |
| 5   | 30              | 61                                        | 8                           | 1            |

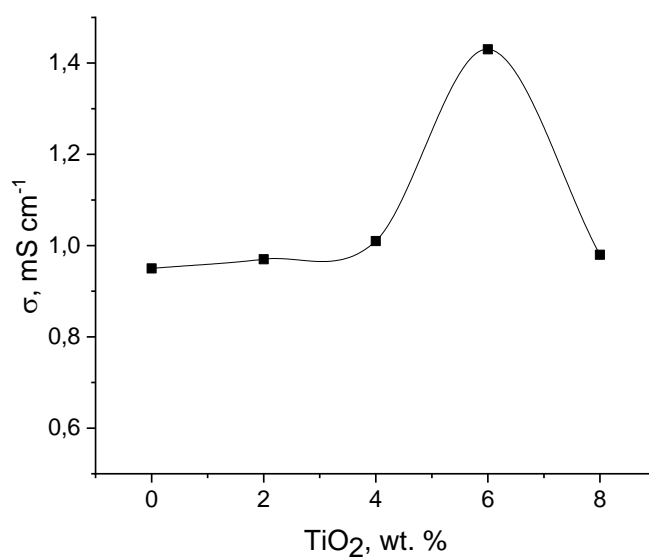**Figure S2.** Dependence of the NPE conductivity on the content of  $\text{TiO}_2$  nanoparticles

**Table S2.** Glass transition temperature of NPE (according to the DSC data)

| Nº                 | $T_{01}$ , °C | $T_{g1}$ , °C | $\Delta T_1$ , °C | $T_{g2}$ , °C | $\Delta T_2$ , °C |
|--------------------|---------------|---------------|-------------------|---------------|-------------------|
| NPE0               | −78.0         | −61.5         | 32.9              | −102.3        | 4.3               |
| NPE2               | −78.9         | −66.0         | 22.0              | −98.6         | 3.9               |
| NPE6               | −83.0         | −66.8         | 28.4              | −98.4         | 3.5               |
| EMIBF <sub>4</sub> | —             | —             | —                 | −103.0        | 4.0               |

*Note.*  $T_{01}$  is the onset of the relaxation transition;  $T_{g1}$  is the temperature of the first relaxation transition (relaxation transition of the cross—linked polymer matrix);  $\Delta T_1$  is the range of the first relaxation transition;  $T_{g2}$  is the glass transition temperature of the second relaxation transition);  $\Delta T_2$  is the range of the second relaxation transition.

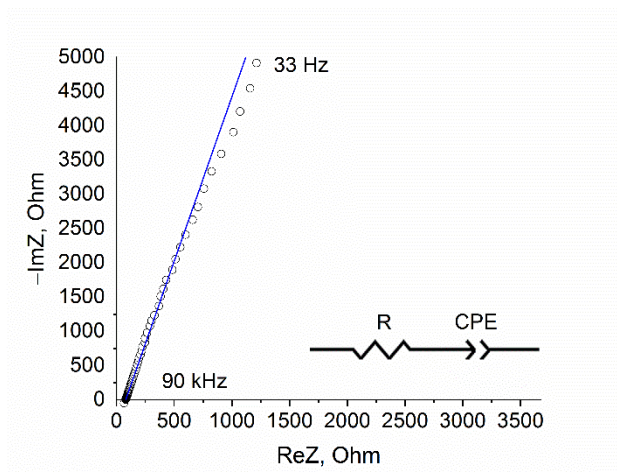

(a)

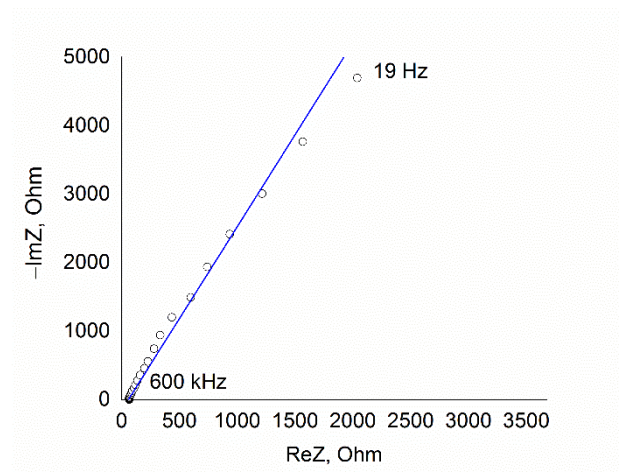

(b)

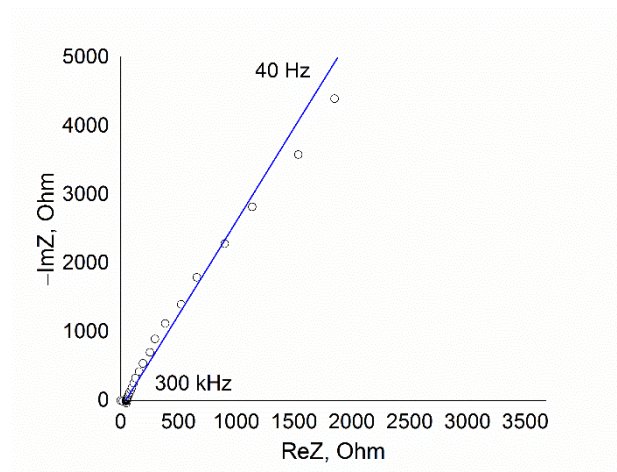

(c)

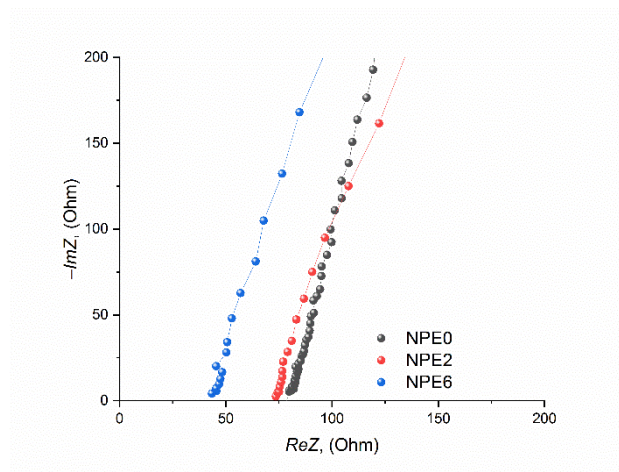

(d)

**Figure S3.** Nyquist plots of the SS/NPE/SS cell at room temperature for (a) NPE0, (b) NPE2, (c) NPE6 and the equivalent circuit models, where  $R$  is the electrolyte resistance,  $CPE$  is the constant phase element, (d) the high frequency region of the Nyquist plots for all NPEs.

**Table S3.** Calculation of elements of equivalent circuit model

| Equivalent<br>circuit element | SS/NPE/SS cells      |                      |                      |
|-------------------------------|----------------------|----------------------|----------------------|
|                               | NPE0                 | NPE2                 | NPE6                 |
| R, Ohm                        | 79.6                 | 57.4                 | 42.8                 |
| CPE—T                         | $1.9 \times 10^{-6}$ | $2.1 \times 10^{-6}$ | $2.3 \times 10^{-6}$ |
| CPE—P                         | 0.87                 | 0.77                 | 0.78                 |

**Table S4.** Conductivity of the nanocomposite polymer gel electrolytes based on the ionic liquid EMIBF<sub>4</sub>

| T, °C | Conductivity, mS cm <sup>-1</sup> |      |      |
|-------|-----------------------------------|------|------|
|       | NPE0                              | NPE2 | NPE6 |
| −40   | 0.1                               | 0.2  | 0.2  |
| −21   | 0.4                               | 0.4  | 0.5  |
| −15   | —                                 | 0.6  | 0.7  |
| 0     | 0.9                               | 1.1  | 1.2  |
| 15    | —                                 | 2.0  | 2.2  |
| 25    | 2.1                               | 3.4  | 3.8  |
| 40    | 3.9                               | 5.6  | 6.5  |
| 60    | 6.2                               | 9.0  | 10.9 |
| 80    | 8.7                               | 12.0 | 15.0 |
| 100   | 15.1                              | 17.0 | 21.0 |

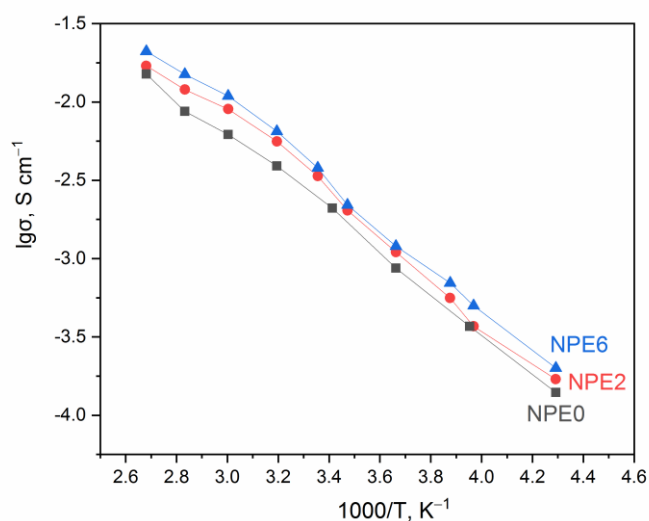**Figure S4.** Arrhenius temperature dependences of the NPE conductivities

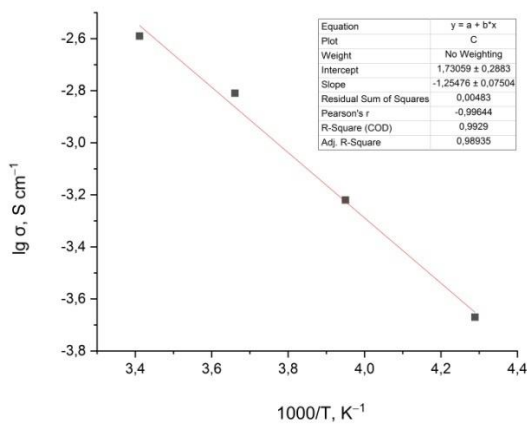

(a)

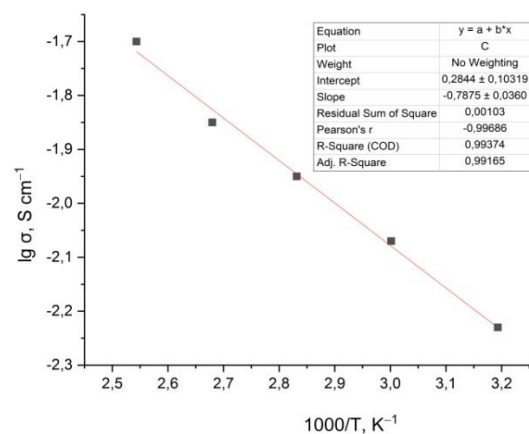

(b)

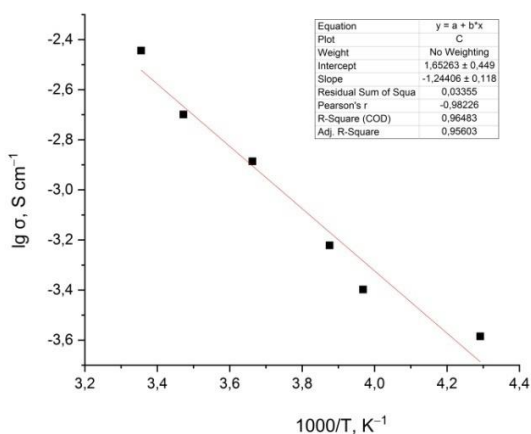

(c)

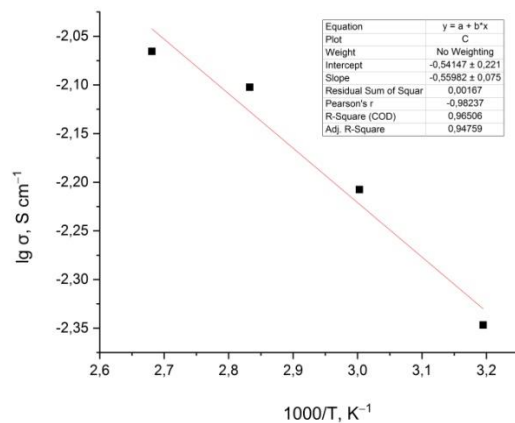

(d)

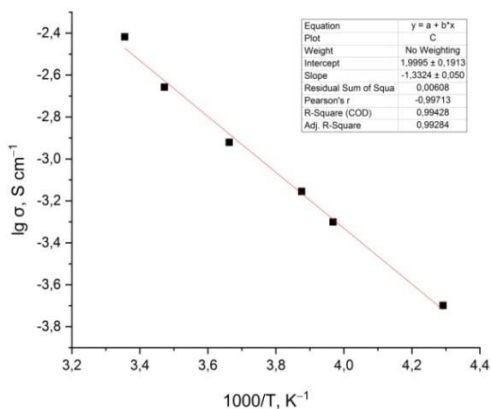

(e)

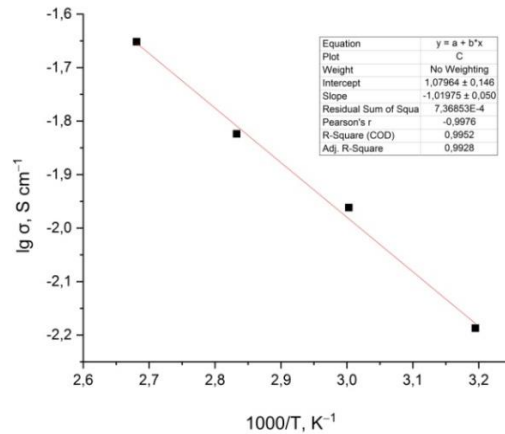

(f)

**Figure S5.** Calculation of the effective conduction activation energy for NPE0 (a, b), NPE2 (c, d) and NPE6 (e, f) in two temperature ranges: from  $-40$  to  $25$  °C (a, c, e) and from  $40$  to  $100$  °C (b, d, f)

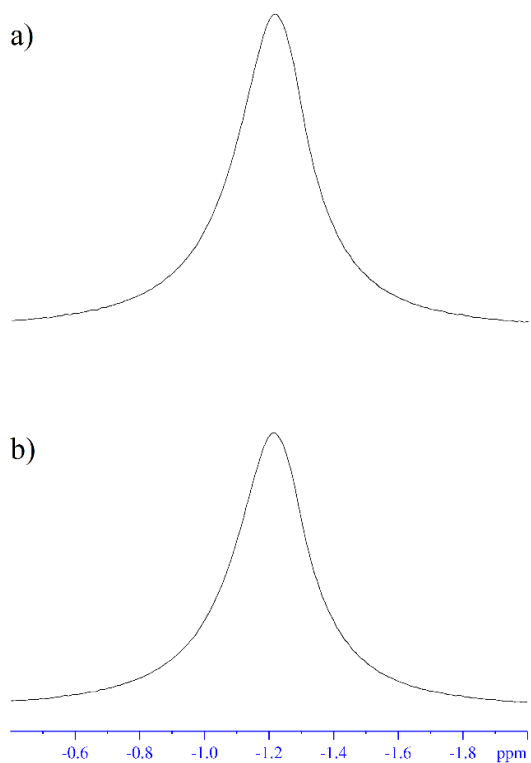

**Figure S6.**  $^7\text{Li}$  NMR spectra of the electrolytes **(a)** NPE2 and **(b)** NPE6

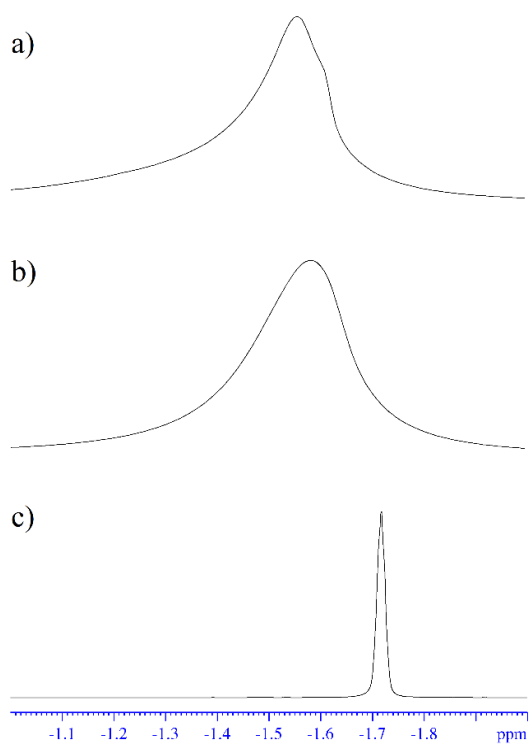

**Figure S7.**  $^{11}\text{B}$  NMR spectra of the electrolytes **(a)** NPE2, **(b)** NPE6 and **(c)** ionic liquid EMIBF<sub>4</sub>

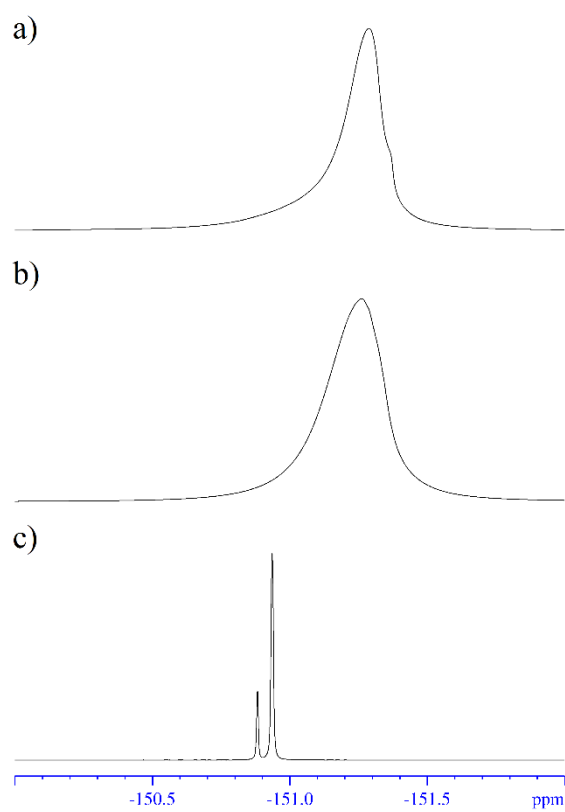

**Figure S8.**  $^{19}\text{F}$  NMR spectra of the electrolytes **(a)** NPE2, **(b)** NPE6 and **(c)** ionic liquid EMIBF<sub>4</sub>

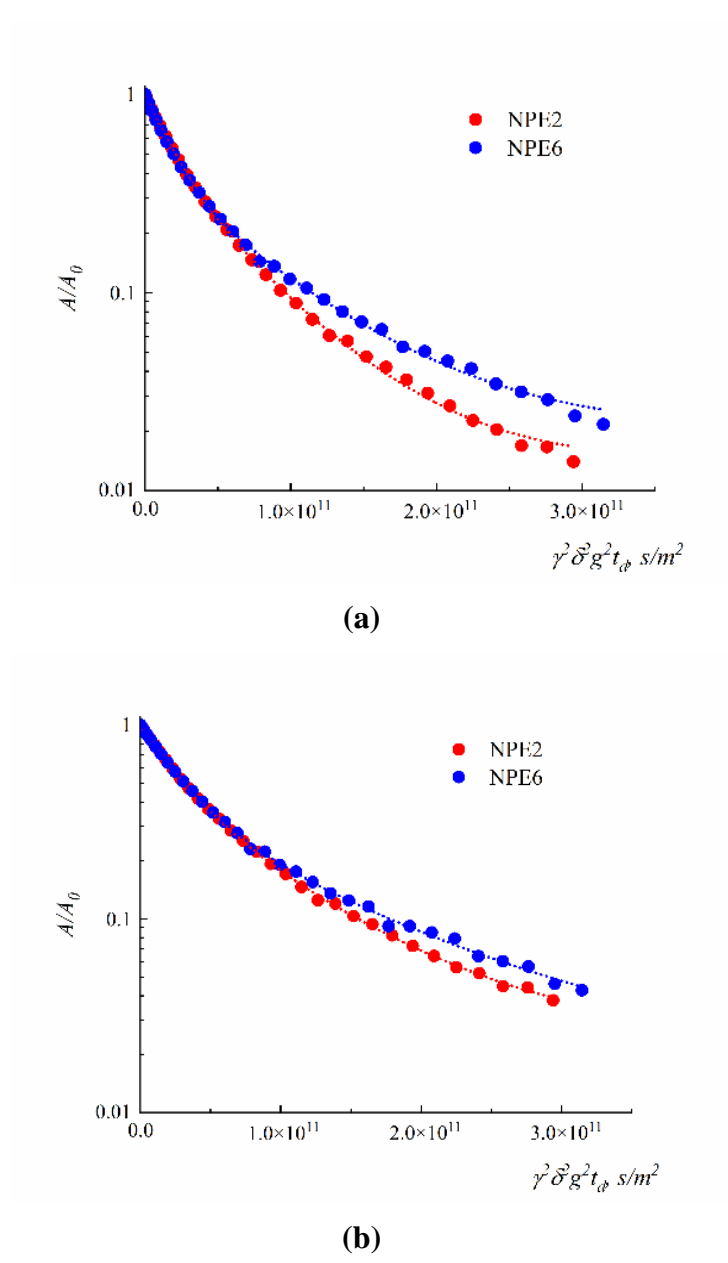

**Figure S9.** Diffusion decays of NPE2 and NPE6 on  $^1\text{H}$  nuclei for (a) EC and (b) EMIBF<sub>4</sub>

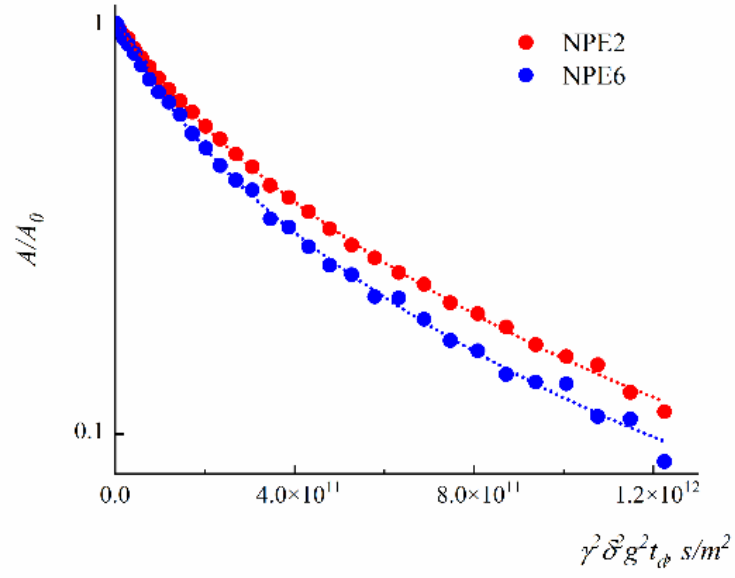

(a)

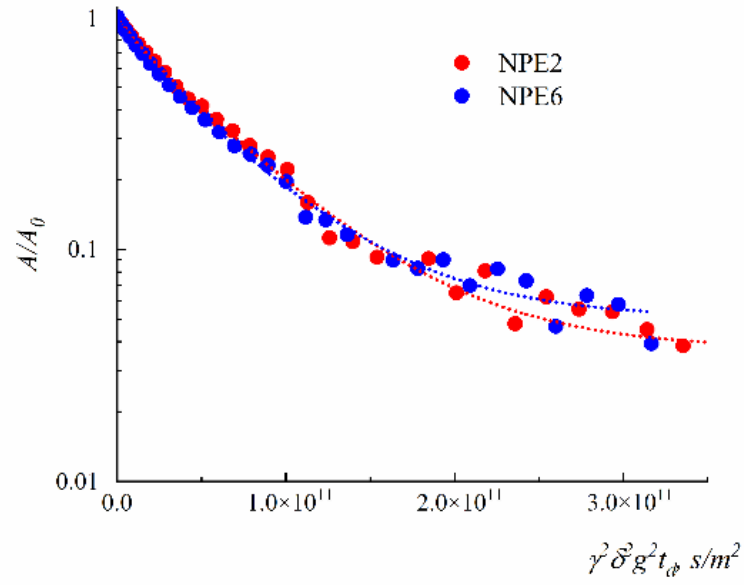

(b)

**Figure S10.** Diffusion decays of NPE2 and NPE6 on (a)  $^7\text{Li}$  and (b)  $^{19}\text{F}$

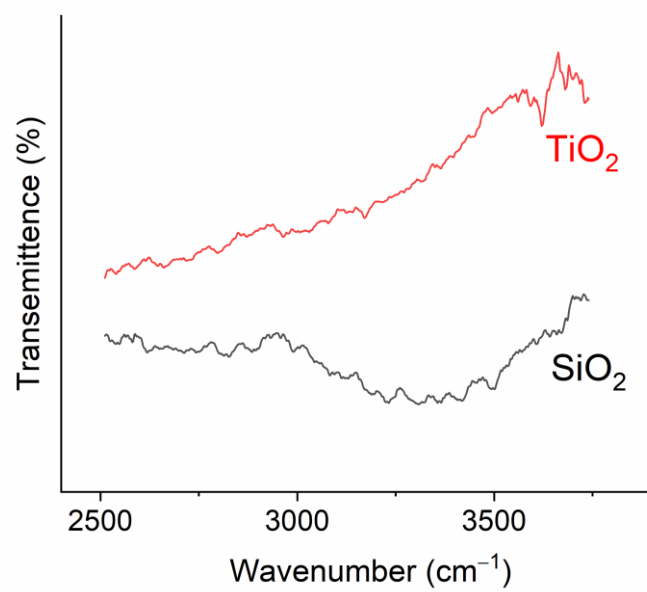

**Figure S11.** FTIR spectra of the TiO<sub>2</sub> and SiO<sub>2</sub> nanoparticles

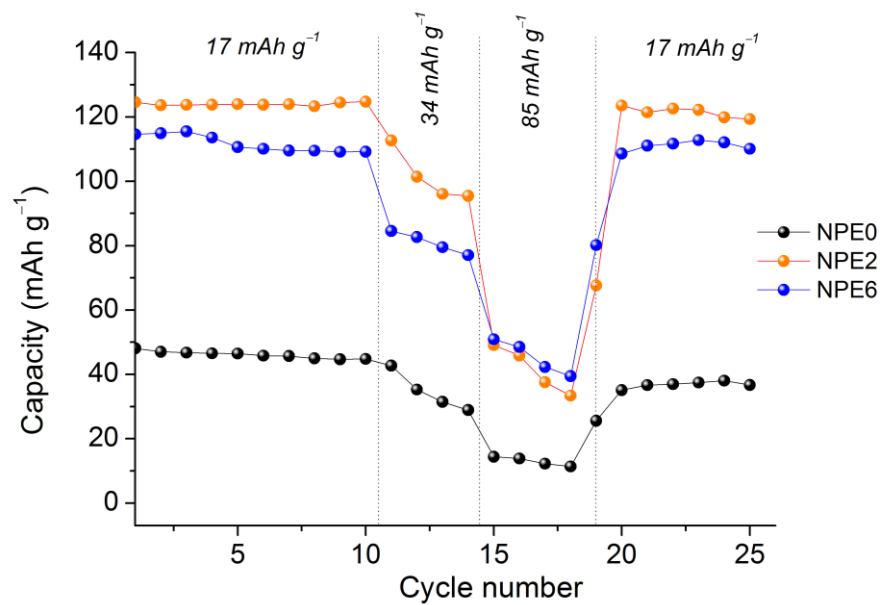

**Figure S12.** Current rate capability of the Li // LiFePO<sub>4</sub> cells in the C/10 to C/2 range.
